# Supplementary material for: Control of the crystallinity in TiO2 microspheres through silica impregnation
Source: Royal Society of Chemistry journal article supplement (doi:10.1039/c2ce25799h), 2012-01-01
Supplement: c2ce25799h.pdf [file c2ce25799h.pdf]

*Supporting Information*

**Control of the crystallinity in TiO<sub>2</sub> microspheres through silica impregnation**

Michael Dahl, Suzanne Dang, Ji Bong Joo, Qiao Zhang and Yadong Yin\*

*Department of Chemistry, University of California, Riverside, CA 92521, USA*

*Fax: +1-951-827-4965; Tel: +1-951-827-4713; E-mail: yadong.yin@ucr.edu.*

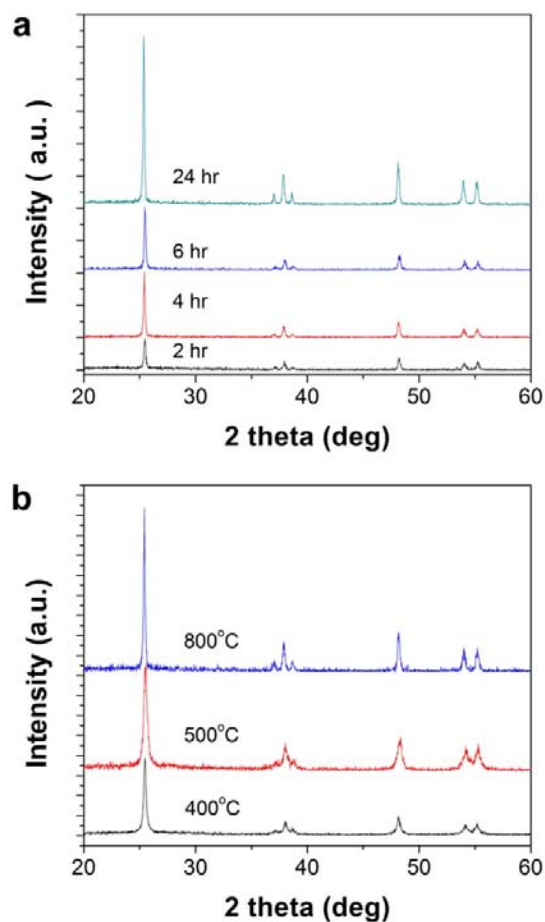

**Fig. S1** a) X-ray diffraction patterns for the calcination of TiO<sub>2</sub> microspheres without silica impregnation at 800°C for different lengths of time showing an increase in crystallinity. b) X-ray diffraction patterns for the calcination of TiO<sub>2</sub> microspheres without silica impregnation for four hours at different temperatures.

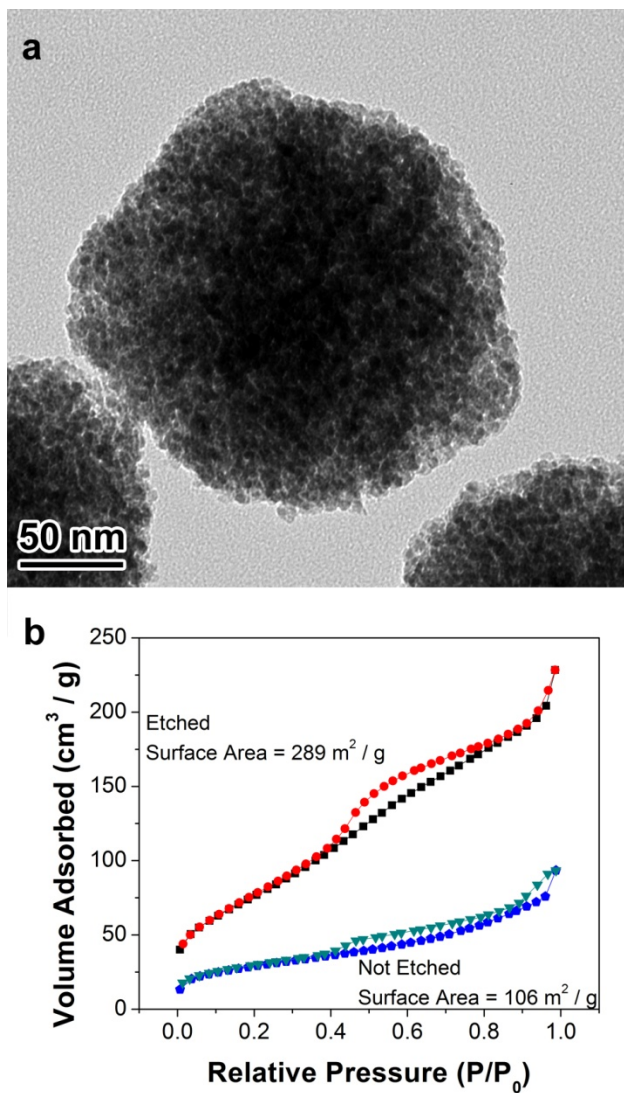

**Fig. S2** a) TEM image of  $\text{TiO}_2$  sample T-3 after  $\text{SiO}_2$  impregnation and calcination. Image is representative of impregnation without a full coating. b)  $\text{N}_2$  adsorption-desorption isotherms for T-3 before and after  $\text{SiO}_2$  removal.

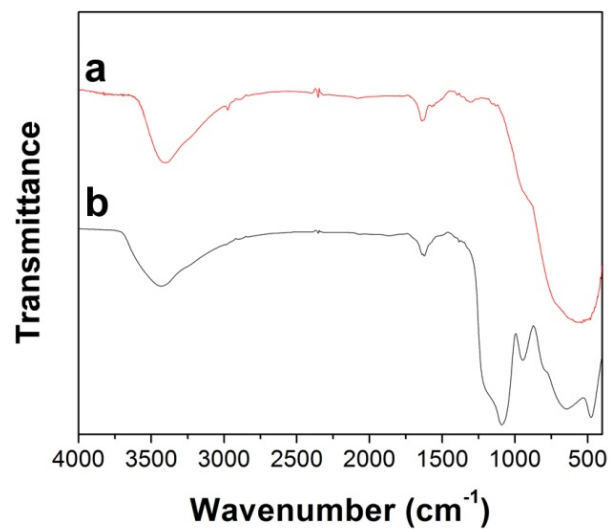

**Fig. S3** FTIR spectra of a) T-3 after etching and b) T-3 before etching showing the disappearance of characteristic Si-O-Si IR bands after etching.

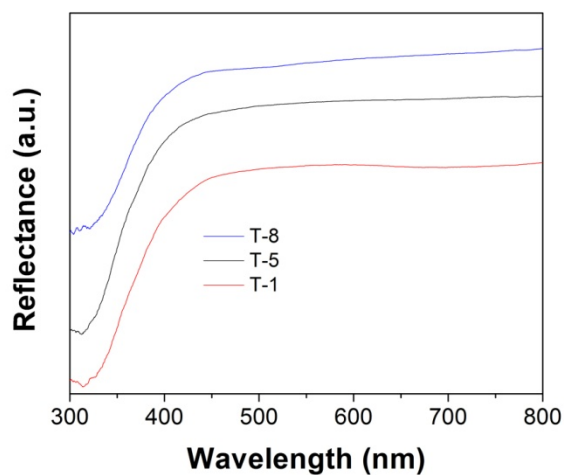

**Fig. S4** UV-Vis diffuse reflectance spectra of samples T-1, T-5 and T-8.
